# Supplementary material for: The Impact of Amino Acids on Postprandial Glucose and Insulin Kinetics in Humans: A Quantitative Overview
Source: MDPI journal article supplement (doi:10.3390/nu12103211), 2020-10-21

NC(=N)NCCCC[C@H](N)C(=O)[O-]

|                 |         |                              |      |   |    |    |      |    |    |       |
|-----------------|---------|------------------------------|------|---|----|----|------|----|----|-------|
| [26] Gannon, MC | Healthy | 25g glucose                  | Oral | 9 | 13 | 30 | 93.8 | 13 | 30 | 124.2 |
|                 | Healthy | 10.6g arginine + 25g glucose | Oral | 9 | 13 | 30 | 65.8 | 13 | 30 | 96.1  |
| [27] Tang, ZQ   | Healthy | 75g glucose                  | Oral | 8 | 6  | 45 | 39.8 | 6  | 45 | 135.1 |
|                 | Healthy | 30g arginine + 35g glucose   | Oral | 8 | 6  | 30 | 42.2 | 6  | 30 | 130.9 |

| C                 | Intravenous arginine infusion |                     |                |            |                     |                            |                                    |                     |                            |                                    |
|-------------------|-------------------------------|---------------------|----------------|------------|---------------------|----------------------------|------------------------------------|---------------------|----------------------------|------------------------------------|
| First author      | Subject condition             | Amount administered | Ingestion type | # Subjects | Insulin time points | Insulin time to peak (min) | Insulin peak concentration (μU/mL) | Glucose time points | Glucose time to peak (min) | Glucose peak concentration (mg/dL) |
| [17] Floyd, JC    | Healthy                       | 15g arginine        | IV-Infusion    | 11         | 10                  | 5                          | 35.1                               | 10                  | 30                         | 104.2                              |
| [28] Giugliano, D | Healthy                       | 30g arginine        | IV-Infusion    | 10         | 9                   | 30                         | 34.2                               | 9                   | 25                         | 107.8                              |
| [29] Coiro, V     | Healthy                       | 30g arginine        | IV-Infusion    | 14         | 9                   | 30                         | 52.8                               | 9                   | 20                         | 108.8                              |

Figure 2 consists of four panels. The first two panels are line graphs showing the time course of Insulin and Glucose levels over 90 minutes. The third and fourth panels are bar graphs showing the area under the curve (AUC) for Insulin and Glucose, respectively.

**Insulin (µU/mL) vs Time (min):**

| Time (min) | 2g (µU/mL) | 2g+ (µU/mL) | 2g- (µU/mL) |
|------------|------------|-------------|-------------|
| 0          | ~10        | ~10         | ~10         |
| 15         | ~35        | ~30         | ~25         |
| 30         | ~30        | ~55         | ~35         |
| 45         | ~15        | ~45         | ~20         |
| 60         | ~10        | ~30         | ~15         |
| 90         | ~10        | ~15         | ~10         |

**Glucose (mg/dL) vs Time (min):**

| Time (min) | 2g (mg/dL) | 2g+ (mg/dL) | 2g- (mg/dL) |
|------------|------------|-------------|-------------|
| 0          | ~80        | ~80         | ~80         |
| 15         | ~95        | ~90         | ~85         |
| 30         | ~105       | ~105        | ~100        |
| 45         | ~95        | ~95         | ~90         |
| 60         | ~85        | ~85         | ~80         |
| 90         | ~85        | ~85         | ~80         |

**iAUC (µU/mL/min):**

| Group | iAUC (µU/mL/min) |
|-------|------------------|
| 2g    | ~10              |
| 2g+   | ~18              |
| 2g-   | ~22              |

**gAUC (mg/dL/min):**

| Group | gAUC (mg/dL/min) |
|-------|------------------|
| 2g    | ~10              |
| 2g+   | ~18              |
| 2g-   | ~12              |

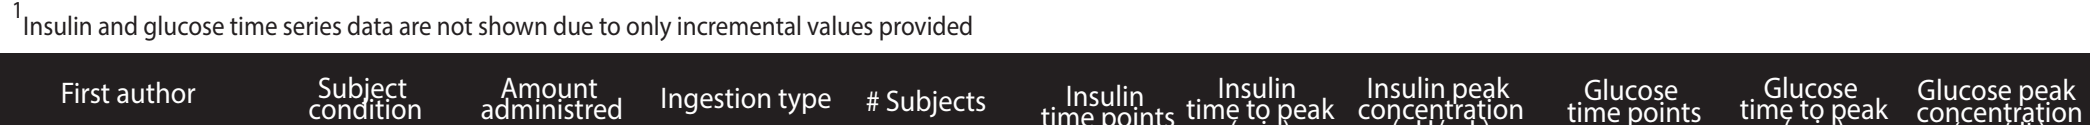

■ Obese - arginine

Dynamic insulin response

Dynamic glucose response

Insulin iAUC

Glucose iAUC

Figure 2 displays four graphs comparing metabolic responses between Obese-arginine (green) and Obese-glucose (purple) groups. The first graph shows dynamic insulin response (μU/mL) over time, with the Obese-arginine group (green) showing a higher peak than the Obese-glucose group (purple). The second graph shows dynamic glucose response (mg/dL) over time, with the Obese-arginine group (green) showing a lower peak than the Obese-glucose group (purple). The third graph shows insulin iAUC (μU/mL/min) as a bar chart, with the Obese-arginine group (green) having a higher area under the curve than the Obese-glucose group (purple). The fourth graph shows glucose iAUC (mg/dL/min) as a bar chart, with the Obese-arginine group (green) having a lower area under the curve than the Obese-glucose group (purple).

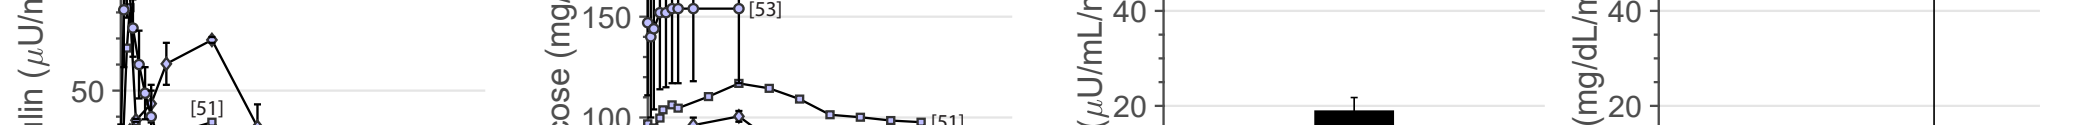

Supplement: s1 [file s1]
