# Supplementary material for: The Impact of Amino Acids on Postprandial Glucose and Insulin Kinetics in Humans: A Quantitative Overview
Source: MDPI journal article supplement (doi:10.3390/nu12103211), 2020-10-21
Supplement: s1 [file s1]

Effect of BCAA intake on glucose and insulin dynamics

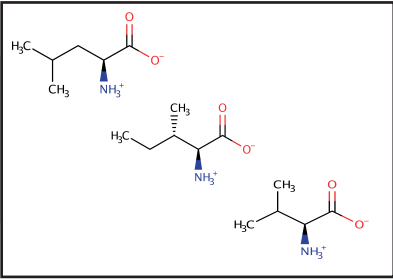

| A               | Oral BCAA ingestion |                    |                |            |                     |                            |                                    |                     |                            |                                    |
|-----------------|---------------------|--------------------|----------------|------------|---------------------|----------------------------|------------------------------------|---------------------|----------------------------|------------------------------------|
| First author    | Subject condition   | Amount administred | Ingestion type | # Subjects | Insulin time points | Insulin time to peak (min) | Insulin peak concentration (μU/mL) | Glucose time points | Glucose time to peak (min) | Glucose peak concentration (mg/dL) |
| [62.1] Zhang, Y | Healthy             | 1g BCAA            | Oral           | 5          | 8                   | 15                         | 7.3                                | 8                   | 0                          | 95.0                               |
| [62.2] Zhang, Y | Healthy             | 5g BCAA            | Oral           | 5          | 8                   | 15                         | 8.5                                | 8                   | 15                         | 96.0                               |
| [63] Gojda, J   | Healthy             | Control            | Oral           | 18         | 11                  | 45                         | 6.6                                | 11                  | 180                        | 83.3                               |
|                 | Healthy             | 30.7g BCAA         | Oral           | 18         | 11                  | 60                         | 12.0                               | 11                  | 0                          | 83.7                               |

Healthy - control  
Healthy - BCAA

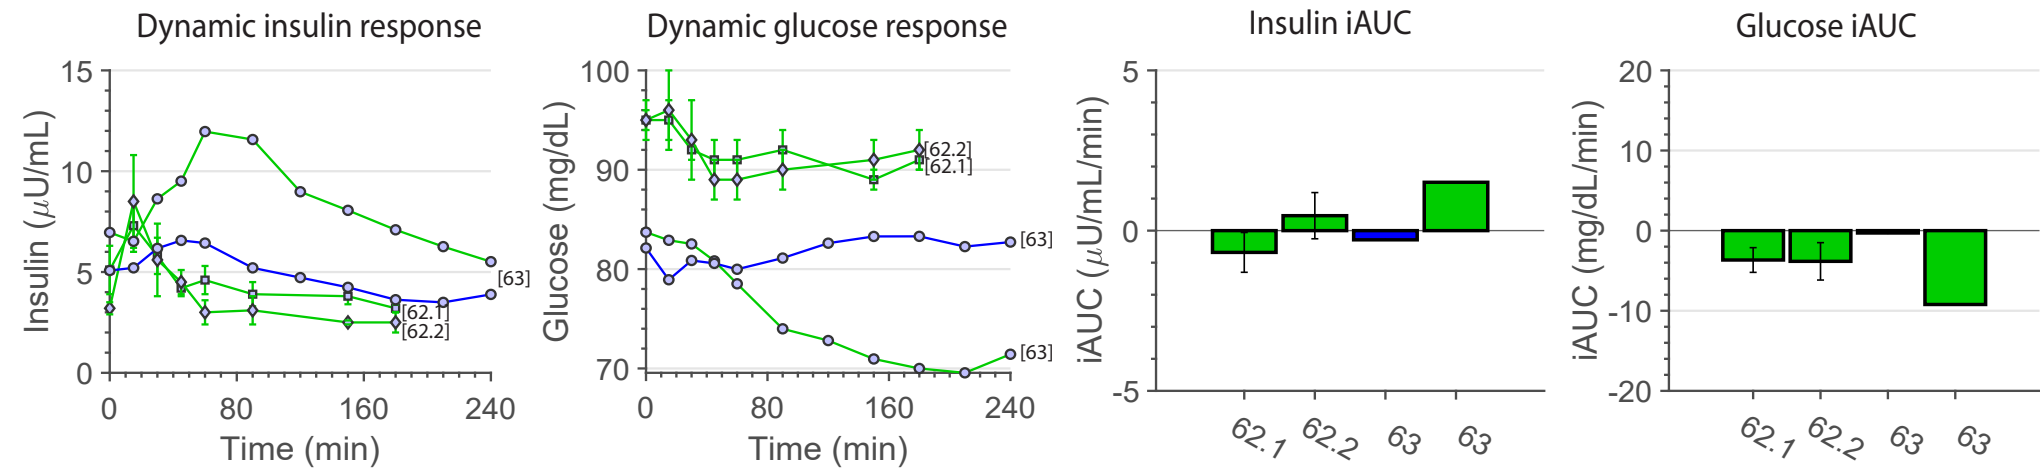

| B            | Oral BCAA+glucose ingestion |                    |                |            |                     |                            |                                    |                     |                            |                                    |
|--------------|-----------------------------|--------------------|----------------|------------|---------------------|----------------------------|------------------------------------|---------------------|----------------------------|------------------------------------|
| First author | Subject condition           | Amount administred | Ingestion type | # Subjects | Insulin time points | Insulin time to peak (min) | Insulin peak concentration (μU/mL) | Glucose time points | Glucose time to peak (min) | Glucose peak concentration (mg/dL) |
| No Data      | No Data                     | No Data            | No Data        | No Data    | No Data             | No Data                    | No Data                            | No Data             | No Data                    | No Data                            |

| C                  | Intravenous BCAA infusion |                    |                |            |                     |                            |                                    |                     |                            |                                    |
|--------------------|---------------------------|--------------------|----------------|------------|---------------------|----------------------------|------------------------------------|---------------------|----------------------------|------------------------------------|
| First author       | Subject condition         | Amount administred | Ingestion type | # Subjects | Insulin time points | Insulin time to peak (min) | Insulin peak concentration (μU/mL) | Glucose time points | Glucose time to peak (min) | Glucose peak concentration (mg/dL) |
| [63] Gojda, J      | Healthy                   | 30.7g BCAA         | IV-Infusion    | 18         | 11                  | 15                         | 10.1                               | 11                  | 0                          | 84.0                               |
| [64.1] Tatpati, LL | Healthy (Young)           | Saline             | IV-Infusion    | 12         | 5                   | 0                          | 4.4                                | 9                   | 0                          | 94.1                               |
|                    | Healthy (Young)           | 18.5g BCAA         | IV-Infusion    | 12         | 5                   | 120                        | 6.2                                | 9                   | 0                          | 92.2                               |
| [64.2] Tatpati, LL | Healthy (Elderly)         | Saline             | IV-Infusion    | 12         | 5                   | 0                          | 4.4                                | 9                   | 0                          | 105.0                              |
|                    | Healthy (Elderly)         | 16.35g BCAA        | IV-Infusion    | 12         | 5                   | 120                        | 4.7                                | 9                   | 0                          | 102.8                              |
| [65] Louard, RJ    | Healthy                   | 3.4g BCAA          | IV-Infusion    | 10         | 5                   | 180                        | 8.6                                | 7                   | 0                          | 86.8                               |

Healthy - saline  
Healthy - BCAA

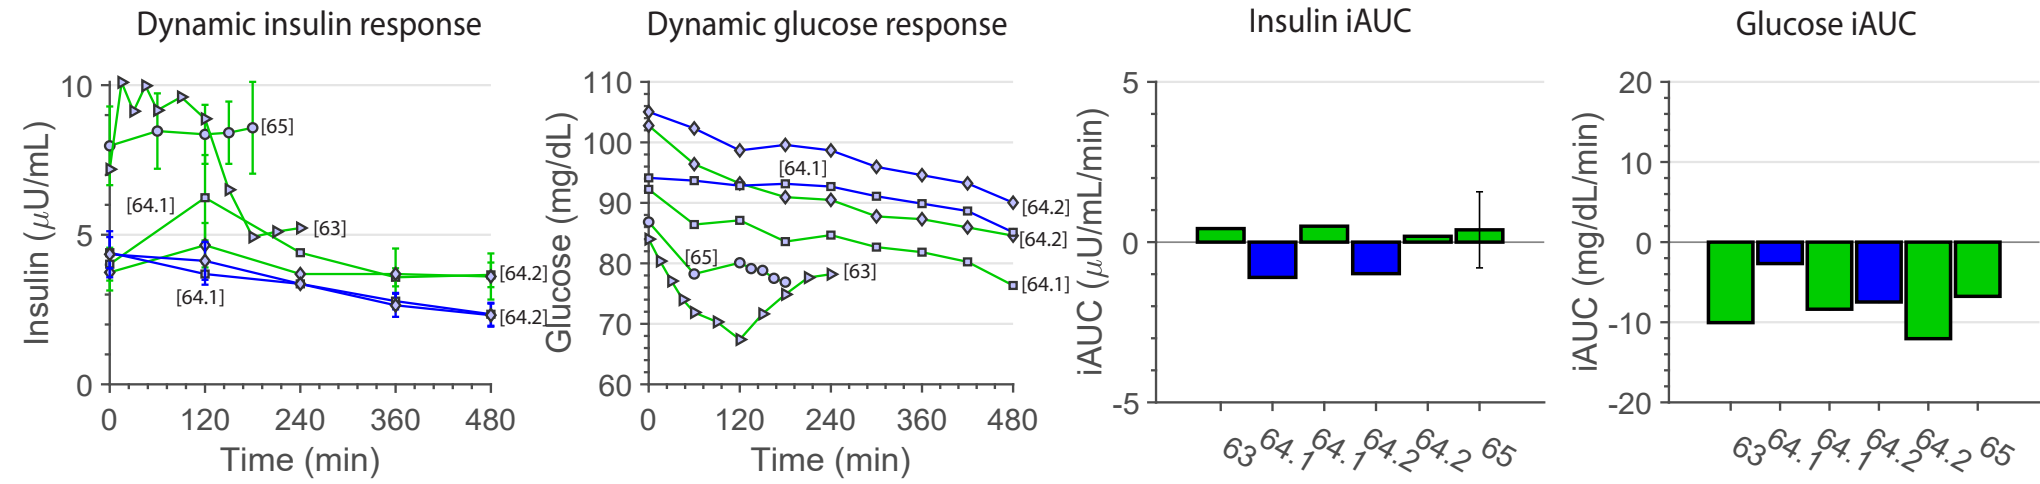

\*iAUC: Incremental area under the curve  
\*\*iAUC, time to peak and peak concentrations were calculated from the extracted data
