# Supplementary material for: The Impact of Amino Acids on Postprandial Glucose and Insulin Kinetics in Humans: A Quantitative Overview
Source: MDPI journal article supplement (doi:10.3390/nu12103211), 2020-10-21
Supplement: s1 [file s1]

Effect of isoleucine intake on glucose and insulin dynamics

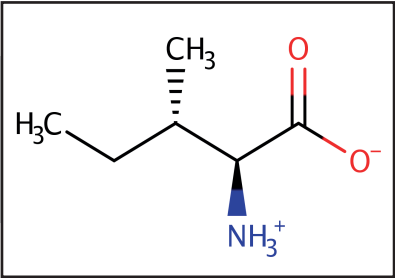

A Oral isoleucine ingestion

| First author    | Subject condition | Amount administered | Ingestion type | # Subjects | Insulin time points | Insulin time to peak (min) | Insulin peak concentration (μU/mL) | Glucose time points | Glucose time to peak (min) | Glucose peak concentration (mg/dL) |
|-----------------|-------------------|---------------------|----------------|------------|---------------------|----------------------------|------------------------------------|---------------------|----------------------------|------------------------------------|
| [18] Nuttal, FQ | Healthy           | Water               | Oral           | 9          | 14                  | 20                         | 11.5                               | 14                  | 60                         | 83.1                               |
|                 | Healthy           | 7.4g isoleucine     | Oral           | 9          | 14                  | 40                         | 12.4                               | 14                  | 0                          | 84.1                               |

Healthy - water  
Healthy - isoleucine

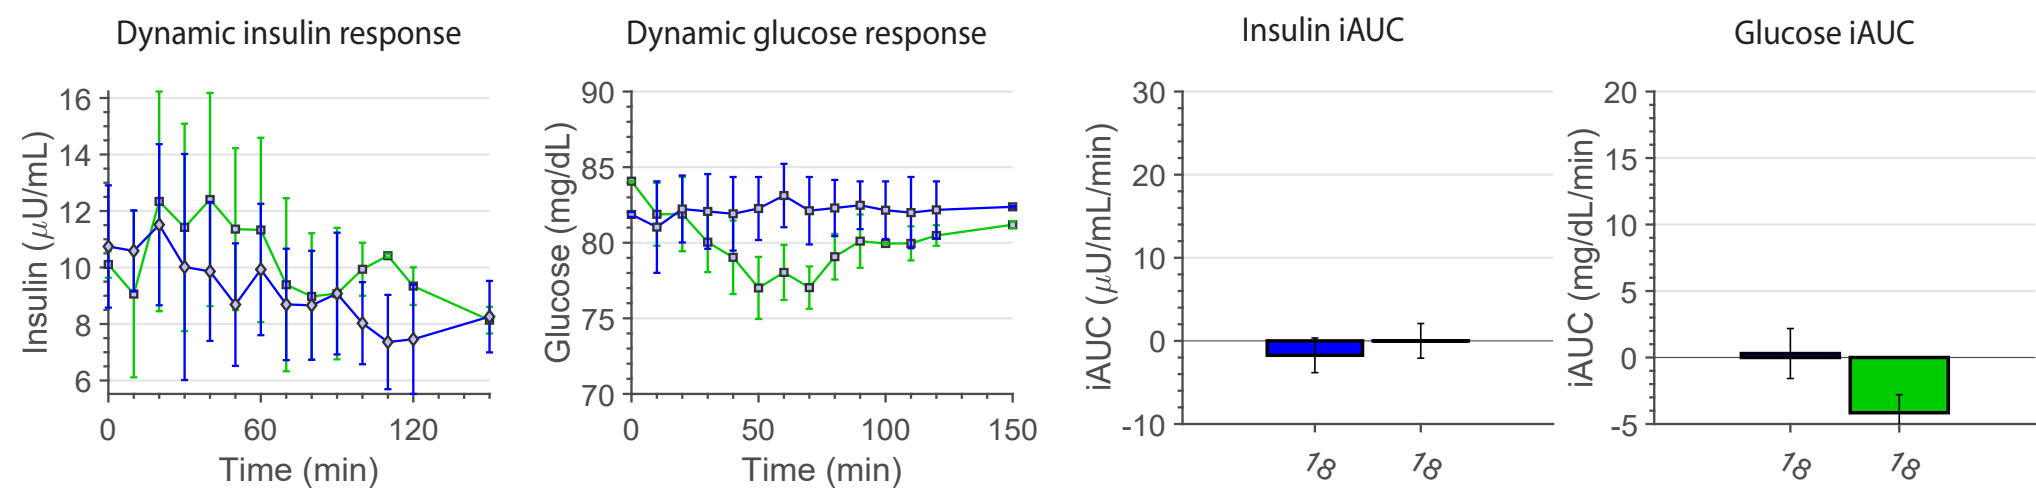

B Oral isoleucine+glucose ingestion

| First author    | Subject condition | Amount administered           | Ingestion type | # Subjects | Insulin time points | Insulin time to peak (min) | Insulin peak concentration (μU/mL) | Glucose time points | Glucose time to peak (min) | Glucose peak concentration (mg/dL) |
|-----------------|-------------------|-------------------------------|----------------|------------|---------------------|----------------------------|------------------------------------|---------------------|----------------------------|------------------------------------|
| [18] Nuttal, FQ | Healthy           | 25g glucose                   | Oral           | 9          | 14                  | 40                         | 47.2                               | 14                  | 40                         | 119.9                              |
|                 | Healthy           | 7.4g isoleucine + 25g glucose | Oral           | 9          | 14                  | 40                         | 70.9                               | 14                  | 30                         | 114.1                              |

Healthy - glucose  
Healthy - isoleucine+glucose

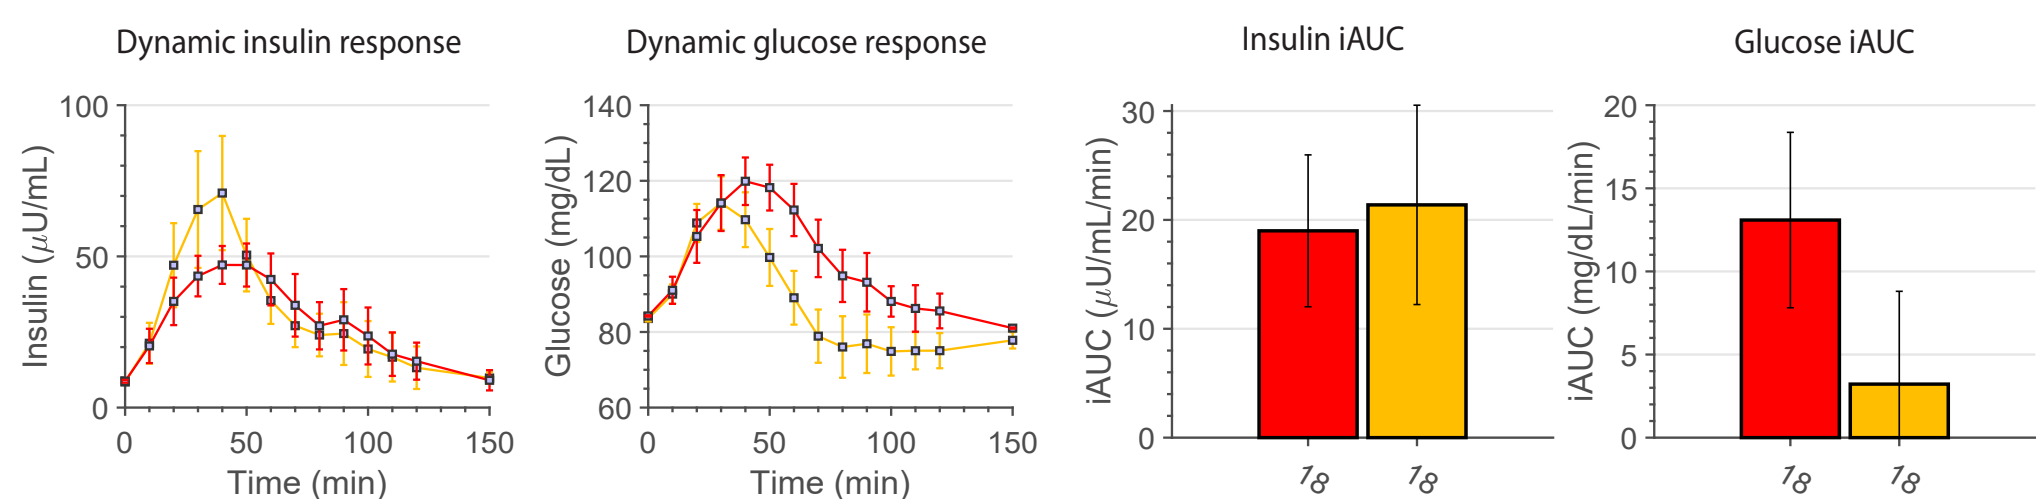

C Intravenous isoleucine infusion

| First author | Subject condition | Amount administered | Ingestion type | # Subjects | Insulin time points | Insulin time to peak (min) | Insulin peak concentration (μU/mL) | Glucose time points | Glucose time to peak (min) | Glucose peak concentration (mg/dL) |
|--------------|-------------------|---------------------|----------------|------------|---------------------|----------------------------|------------------------------------|---------------------|----------------------------|------------------------------------|
| No Data      | No Data           | No Data             | No Data        | No Data    | No Data             | No Data                    | No Data                            | No Data             | No Data                    | No Data                            |

\*iAUC: Incremental area under the curve  
\*\*iAUC, time to peak and peak concentrations were calculated from the extracted data
