# Supplementary material for: The Impact of Amino Acids on Postprandial Glucose and Insulin Kinetics in Humans: A Quantitative Overview
Source: MDPI journal article supplement (doi:10.3390/nu12103211), 2020-10-21
Supplement: s1 [file s1]

Effect of lysine intake on glucose and insulin dynamics

NC(CCC[C@@H](N)C(=O)[O-])

| A                                                                                                                                                                                                          | Oral lysine ingestion         |                         |                |            |                     |                            |                                    |                     |                            |                                    |
|------------------------------------------------------------------------------------------------------------------------------------------------------------------------------------------------------------|-------------------------------|-------------------------|----------------|------------|---------------------|----------------------------|------------------------------------|---------------------|----------------------------|------------------------------------|
| First author                                                                                                                                                                                               | Subject condition             | Amount administered     | Ingestion type | # Subjects | Insulin time points | Insulin time to peak (min) | Insulin peak concentration (μU/mL) | Glucose time points | Glucose time to peak (min) | Glucose peak concentration (mg/dL) |
| [54] Kalogeropoulou, D                                                                                                                                                                                     | Healthy                       | Water                   | Oral           | 13         | 14                  | 20                         | 7.0                                | 14                  | 150                        | 81.7                               |
|                                                                                                                                                                                                            | Healthy                       | 11g lysine              | Oral           | 13         | 14                  | 10                         | 9.8                                | 14                  | 150                        | 86.0                               |
| <div><div>Healthy - water</div><div>Healthy - lysine</div></div> <div><div>Dynamic insulin response</div><div>Dynamic glucose response</div><div>Insulin iAUC</div><div>Glucose iAUC</div></div>           |                               |                         |                |            |                     |                            |                                    |                     |                            |                                    |
| B                                                                                                                                                                                                          | Oral lysine+glucose ingestion |                         |                |            |                     |                            |                                    |                     |                            |                                    |
| First author                                                                                                                                                                                               | Subject condition             | Amount administered     | Ingestion type | # Subjects | Insulin time points | Insulin time to peak (min) | Insulin peak concentration (μU/mL) | Glucose time points | Glucose time to peak (min) | Glucose peak concentration (mg/dL) |
| [54] Kalogeropoulou, D                                                                                                                                                                                     | Healthy                       | 25g glucose             | Oral           | 13         | 14                  | 30                         | 35.4                               | 14                  | 40                         | 124.0                              |
|                                                                                                                                                                                                            | Healthy                       | 11g lysine +25g glucose | Oral           | 13         | 14                  | 30                         | 38.7                               | 14                  | 30                         | 109.9                              |
| <div><div>Healthy - glucose</div><div>Healthy - lysine+glucose</div></div> <div><div>Dynamic insulin response</div><div>Dynamic glucose response</div><div>Insulin iAUC</div><div>Glucose iAUC</div></div> |                               |                         |                |            |                     |                            |                                    |                     |                            |                                    |
| C                                                                                                                                                                                                          | Intravenous lysine infusion   |                         |                |            |                     |                            |                                    |                     |                            |                                    |
| First author                                                                                                                                                                                               | Subject condition             | Amount administered     | Ingestion type | # Subjects | Insulin time points | Insulin time to peak (min) | Insulin peak concentration (μU/mL) | Glucose time points | Glucose time to peak (min) | Glucose peak concentration (mg/dL) |
| [17] Floyd, JC                                                                                                                                                                                             | Healthy                       | 15g lysine              | IV-infusion    | 11         | 10                  | 5                          | 37.0                               | 10                  | 5                          | 97.7                               |
| <div><div>Healthy - lysine</div></div> <div><div>Dynamic insulin response</div><div>Dynamic glucose response</div><div>Insulin iAUC</div><div>Glucose iAUC</div></div>                                     |                               |                         |                |            |                     |                            |                                    |                     |                            |                                    |

\*iAUC: Incremental area under the curve  
\*\*iAUC, time to peak and peak concentrations were calculated from the extracted data
