# Supplementary material for: The Impact of Amino Acids on Postprandial Glucose and Insulin Kinetics in Humans: A Quantitative Overview
Source: MDPI journal article supplement (doi:10.3390/nu12103211), 2020-10-21
Supplement: s1 [file s1]

Effect of phenylalanine intake on glucose and insulin dynamics

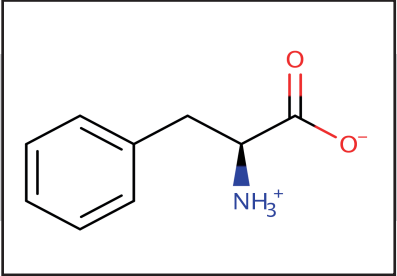

| A                                                                                                                                                                                                                               |                   |                                 |                |            |                     |                            |                                    |                     |                            |                                    |  |
|---------------------------------------------------------------------------------------------------------------------------------------------------------------------------------------------------------------------------------|-------------------|---------------------------------|----------------|------------|---------------------|----------------------------|------------------------------------|---------------------|----------------------------|------------------------------------|--|
| Oral phenylalanine ingestion                                                                                                                                                                                                    |                   |                                 |                |            |                     |                            |                                    |                     |                            |                                    |  |
| First author                                                                                                                                                                                                                    | Subject condition | Amount administered             | Ingestion type | # Subjects | Insulin time points | Insulin time to peak (min) | Insulin peak concentration (μU/mL) | Glucose time points | Glucose time to peak (min) | Glucose peak concentration (mg/dL) |  |
| [58] Nuttal, FQ                                                                                                                                                                                                                 | Healthy           | Water                           | Oral           | 6          | 14                  | 20                         | 9.9                                | 14                  | 100                        | 80.0                               |  |
|                                                                                                                                                                                                                                 | Healthy           | 9.7g phenylalanine              | Oral           | 6          | 14                  | 30                         | 14.4                               | 14                  | 60                         | 84.2                               |  |
| <div><div></div> Healthy - water</div> <div><div></div> Healthy - phenylalanine</div> <div><div>Dynamic insulin response</div><div>Dynamic glucose response</div><div>Insulin iAUC</div><div>Glucose iAUC</div></div>           |                   |                                 |                |            |                     |                            |                                    |                     |                            |                                    |  |
| B                                                                                                                                                                                                                               |                   |                                 |                |            |                     |                            |                                    |                     |                            |                                    |  |
| Oral phenylalanine+glucose ingestion                                                                                                                                                                                            |                   |                                 |                |            |                     |                            |                                    |                     |                            |                                    |  |
| First author                                                                                                                                                                                                                    | Subject condition | Amount administered             | Ingestion type | # Subjects | Insulin time points | Insulin time to peak (min) | Insulin peak concentration (μU/mL) | Glucose time points | Glucose time to peak (min) | Glucose peak concentration (mg/dL) |  |
| [58] Nuttal, FQ                                                                                                                                                                                                                 | Healthy           | 25g glucose                     | Oral           | 6          | 14                  | 50                         | 49.3                               | 14                  | 40                         | 109.8                              |  |
|                                                                                                                                                                                                                                 | Healthy           | 9.7g phenylalanine +25g glucose | Oral           | 6          | 14                  | 30                         | 64.8                               | 14                  | 30                         | 112.7                              |  |
| <div><div></div> Healthy - glucose</div> <div><div></div> Healthy - phenylalanine+glucose</div> <div><div>Dynamic insulin response</div><div>Dynamic glucose response</div><div>Insulin iAUC</div><div>Glucose iAUC</div></div> |                   |                                 |                |            |                     |                            |                                    |                     |                            |                                    |  |
| C                                                                                                                                                                                                                               |                   |                                 |                |            |                     |                            |                                    |                     |                            |                                    |  |
| Intravenous phenylalanine infusion                                                                                                                                                                                              |                   |                                 |                |            |                     |                            |                                    |                     |                            |                                    |  |
| First author                                                                                                                                                                                                                    | Subject condition | Amount administered             | Ingestion type | # Subjects | Insulin time points | Insulin time to peak (min) | Insulin peak concentration (μU/mL) | Glucose time points | Glucose time to peak (min) | Glucose peak concentration (mg/dL) |  |
| [17] Floyd, JC                                                                                                                                                                                                                  | Healthy           | 15g phenylalanine               | IV-Infusion    | 11         | 10                  | 5                          | 20.2                               | 10                  | 0                          | 93.4                               |  |
| <div><div></div> Healthy - phenylalanine</div> <div><div>Dynamic insulin response</div><div>Dynamic glucose response</div><div>Insulin iAUC</div><div>Glucose iAUC</div></div>                                                  |                   |                                 |                |            |                     |                            |                                    |                     |                            |                                    |  |

\*iAUC: Incremental area under the curve  
\*\*iAUC, time to peak and peak concentrations were calculated from the extracted data
