# Supplementary material for: The Impact of Amino Acids on Postprandial Glucose and Insulin Kinetics in Humans: A Quantitative Overview
Source: MDPI journal article supplement (doi:10.3390/nu12103211), 2020-10-21
Supplement: s1 [file s1]

| A                         |                   |                    |                |            |                     |                            |                                    |                     |                            |                                    |
|---------------------------|-------------------|--------------------|----------------|------------|---------------------|----------------------------|------------------------------------|---------------------|----------------------------|------------------------------------|
| Oral alanine ingestion    |                   |                    |                |            |                     |                            |                                    |                     |                            |                                    |
| First author              | Subject condition | Amount administred | Ingestion type | # Subjects | Insulin time points | Insulin time to peak (min) | Insulin peak concentration (μU/mL) | Glucose time points | Glucose time to peak (min) | Glucose peak concentration (mg/dL) |
| [19] Rossini, AA          | Healthy           | 10g alanine        | Oral           | 6          | 6                   | 30                         | 18.9                               | 6                   | 120                        | 75.0                               |
| [20] Rose, DP             | Healthy           | 11.9g alanine      | Oral           | 13         | 7                   | 30                         | 18.2                               | 7                   | 0                          | 88.0                               |
| [21] Sato, T <sup>1</sup> | Healthy           | 64.6g alanine      | Oral           | 5          | 5                   | 60                         | -                                  | 5                   | 0                          | 68.7                               |
| [22.1] Genuth, SM         | Healthy           | 33.8g alanine      | Oral           | 10         | 10                  | 45                         | 32.7                               | 10                  | 15                         | 88.3                               |
|                           | T2DM              | 37.5g alanine      | Oral           | 10         | 10                  | 90                         | 28.3                               | 10                  | 0                          | 271.7                              |
| [22.2] Genuth, SM         | Healthy           | 6.8g alanine       | Oral           | 10         | 10                  | 30                         | 26.9                               | 10                  | 15                         | 91.2                               |
|                           | T2DM              | 8.2g alanine       | Oral           | 10         | 10                  | 30                         | 21.8                               | 10                  | 60                         | 297.8                              |
| [23] Genuth, SM           | Obese             | 50g alanine        | Oral           | 6          | 9                   | 45                         | 214.8                              | 9                   | 0                          | 114.4                              |

Healthy - alanine  
T2DM - alanine  
Obese - alanine

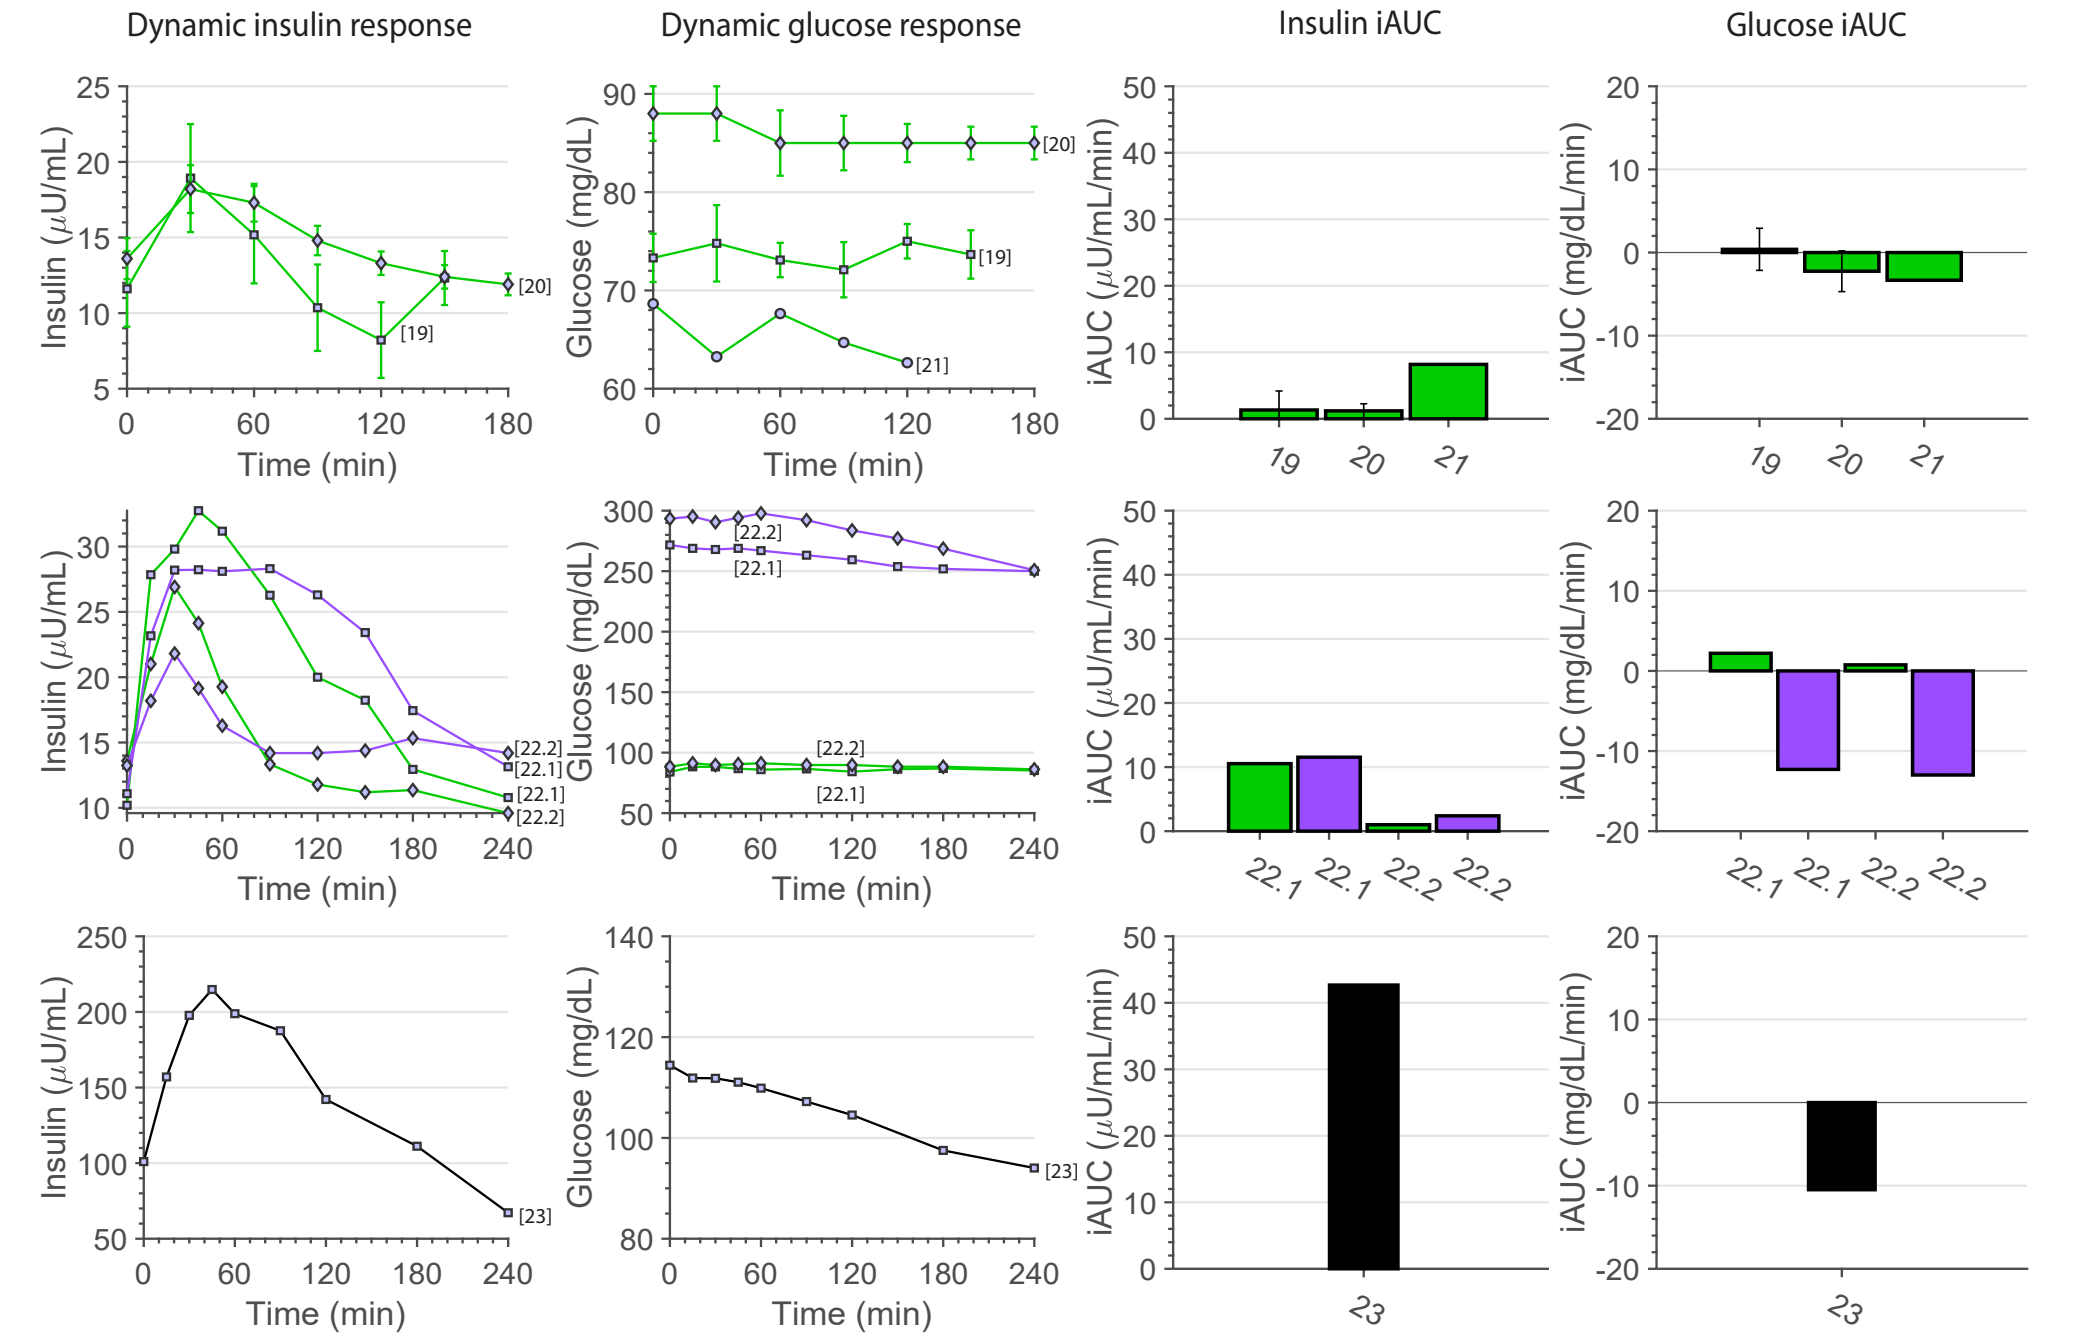

<sup>1</sup>Insulin time series data is not shown due to only incremental values provided

| B                              |                   |                    |                |            |                     |                            |                                    |                     |                            |                                    |
|--------------------------------|-------------------|--------------------|----------------|------------|---------------------|----------------------------|------------------------------------|---------------------|----------------------------|------------------------------------|
| Oral alanine+glucose ingestion |                   |                    |                |            |                     |                            |                                    |                     |                            |                                    |
| First author                   | Subject condition | Amount administred | Ingestion type | # Subjects | Insulin time points | Insulin time to peak (min) | Insulin peak concentration (μU/mL) | Glucose time points | Glucose time to peak (min) | Glucose peak concentration (mg/dL) |
| No Data                        | No Data           | No Data            | No Data        | No Data    | No Data             | No Data                    | No Data                            | No Data             | No Data                    | No Data                            |

| C                            |                   |                    |                |            |                     |                            |                                    |                     |                            |                                    |
|------------------------------|-------------------|--------------------|----------------|------------|---------------------|----------------------------|------------------------------------|---------------------|----------------------------|------------------------------------|
| Intravenous alanine infusion |                   |                    |                |            |                     |                            |                                    |                     |                            |                                    |
| First author                 | Subject condition | Amount administred | Ingestion type | # Subjects | Insulin time points | Insulin time to peak (min) | Insulin peak concentration (μU/mL) | Glucose time points | Glucose time to peak (min) | Glucose peak concentration (mg/dL) |
| [19] Rossini, AA             | Healthy           | 10g alanine        | IV-infusion    | 6          | 6                   | 30                         | 13.9                               | 6                   | 30                         | 75.7                               |
| [24] Asano, T                | Healthy           | 5.3g alanine       | IV-infusion    | 9          | 10                  | 5                          | 17.9                               | 10                  | 5                          | 92.0                               |
|                              | Obese             | 8.9g alanine       | IV-infusion    | 6          | 10                  | 20                         | 36.3                               | 10                  | 20                         | 90.7                               |

Healthy - alanine  
Obese - alanine

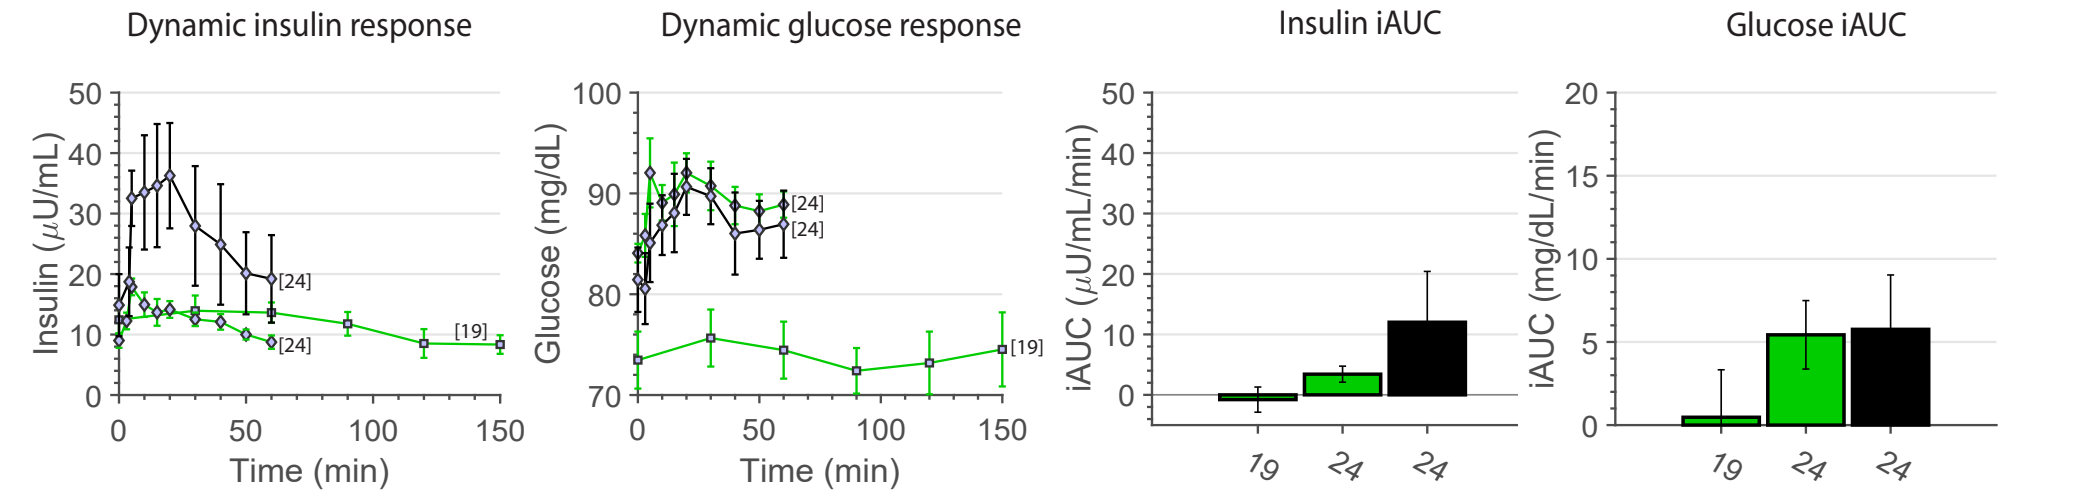

\*iAUC: Incremental area under the curve  
\*\*iAUC, time to peak and peak concentrations were calculated from the extracted data
