# Supplementary material for: The Impact of Amino Acids on Postprandial Glucose and Insulin Kinetics in Humans: A Quantitative Overview
Source: MDPI journal article supplement (doi:10.3390/nu12103211), 2020-10-21
Supplement: s1 [file s1]

[NH3+]CC(=O)[O-]

 Healthy - water  
 Healthy - glycine

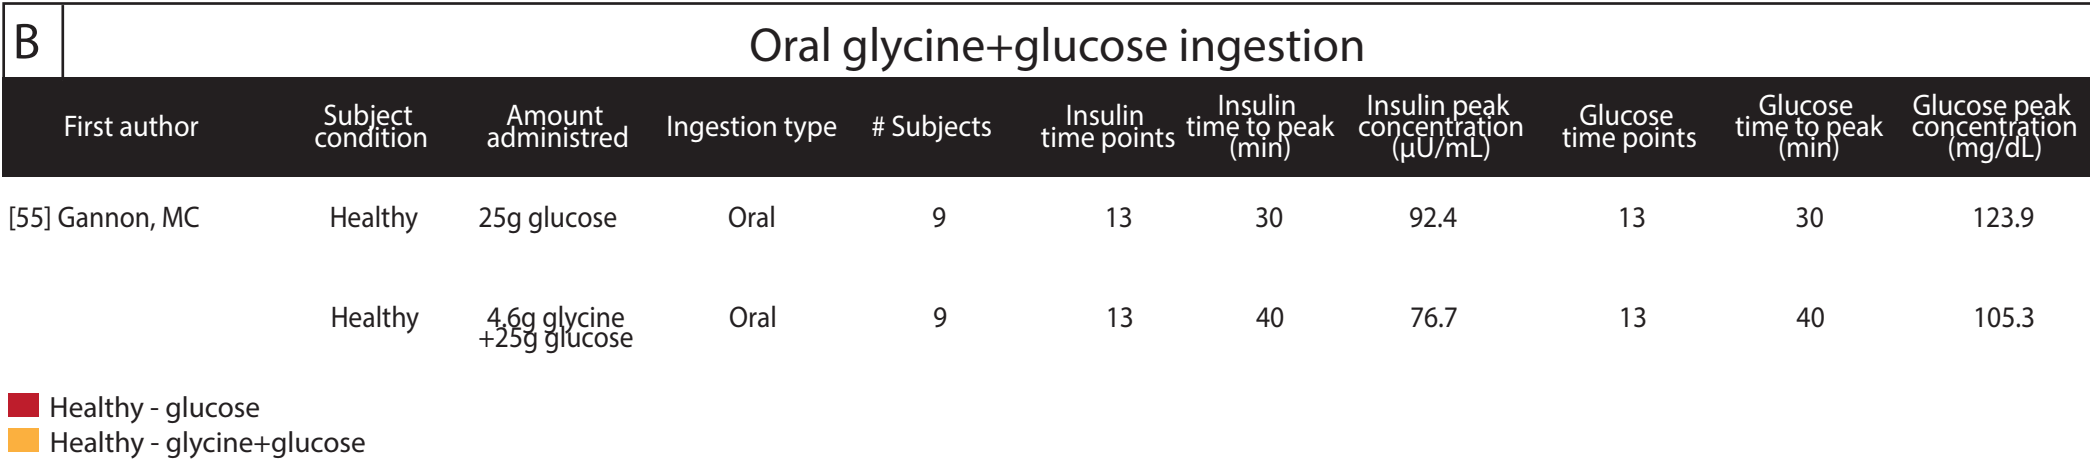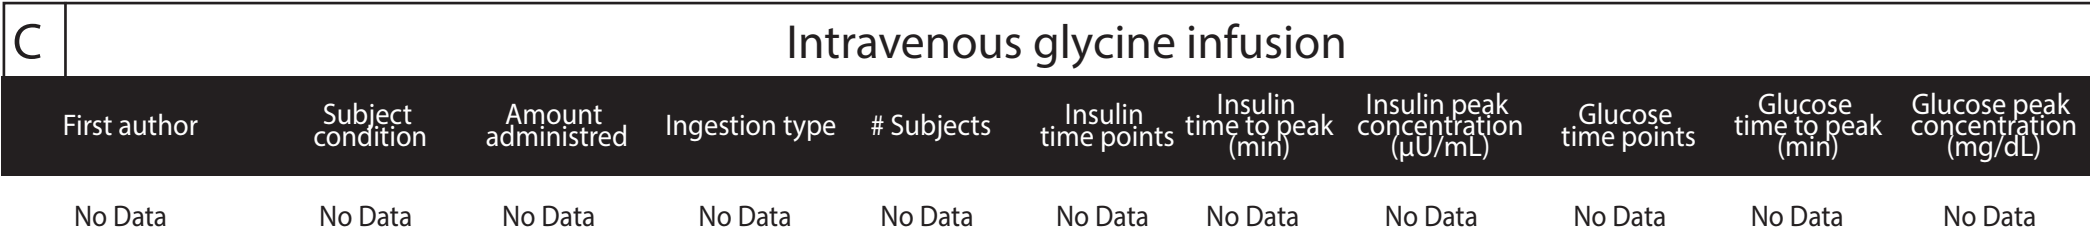

**\*\*iAUC, time to peak and peak concentrations were calculated from the extracted data**
