# Supplementary material for: The Impact of Amino Acids on Postprandial Glucose and Insulin Kinetics in Humans: A Quantitative Overview
Source: MDPI journal article supplement (doi:10.3390/nu12103211), 2020-10-21
Supplement: s1 [file s1]

Effect of glutamate intake on glucose and insulin dynamics

NC(CC(=O)O)C(=O)[O-]

| A                               | Oral glutamate ingestion |                     |                |            |                     |                            |                                    |                     |                            |                                    |
|---------------------------------|--------------------------|---------------------|----------------|------------|---------------------|----------------------------|------------------------------------|---------------------|----------------------------|------------------------------------|
| First author                    | Subject condition        | Amount administered | Ingestion type | # Subjects | Insulin time points | Insulin time to peak (min) | Insulin peak concentration (μU/mL) | Glucose time points | Glucose time to peak (min) | Glucose peak concentration (mg/dL) |
| [59] Di Sibastiano, KM          | Healthy                  | Control             | Oral           | 9          | 11                  | 40                         | 5.5                                | 11                  | 30                         | 82.8                               |
|                                 | Healthy                  | 11.9 glutamate      | Oral           | 9          | 11                  | 40                         | 9.0                                | 11                  | 10                         | 81.1                               |
| [60] Fernstrom, JD <sup>1</sup> | Healthy                  | Control             | Oral           | 8          | 13                  | 0                          | 5.2                                | -                   | -                          | -                                  |
|                                 | Healthy                  | 12.7g glutamate     | Oral           | 8          | 13                  | 20                         | 11.6                               | -                   | -                          | -                                  |
| [61] Graham, TE <sup>1</sup>    | Healthy                  | 11.5g glutamate     | Oral           | 9          | 8                   | 15                         | 11.2                               | -                   | -                          | -                                  |

Healthy - water/control  
Healthy - glutamate

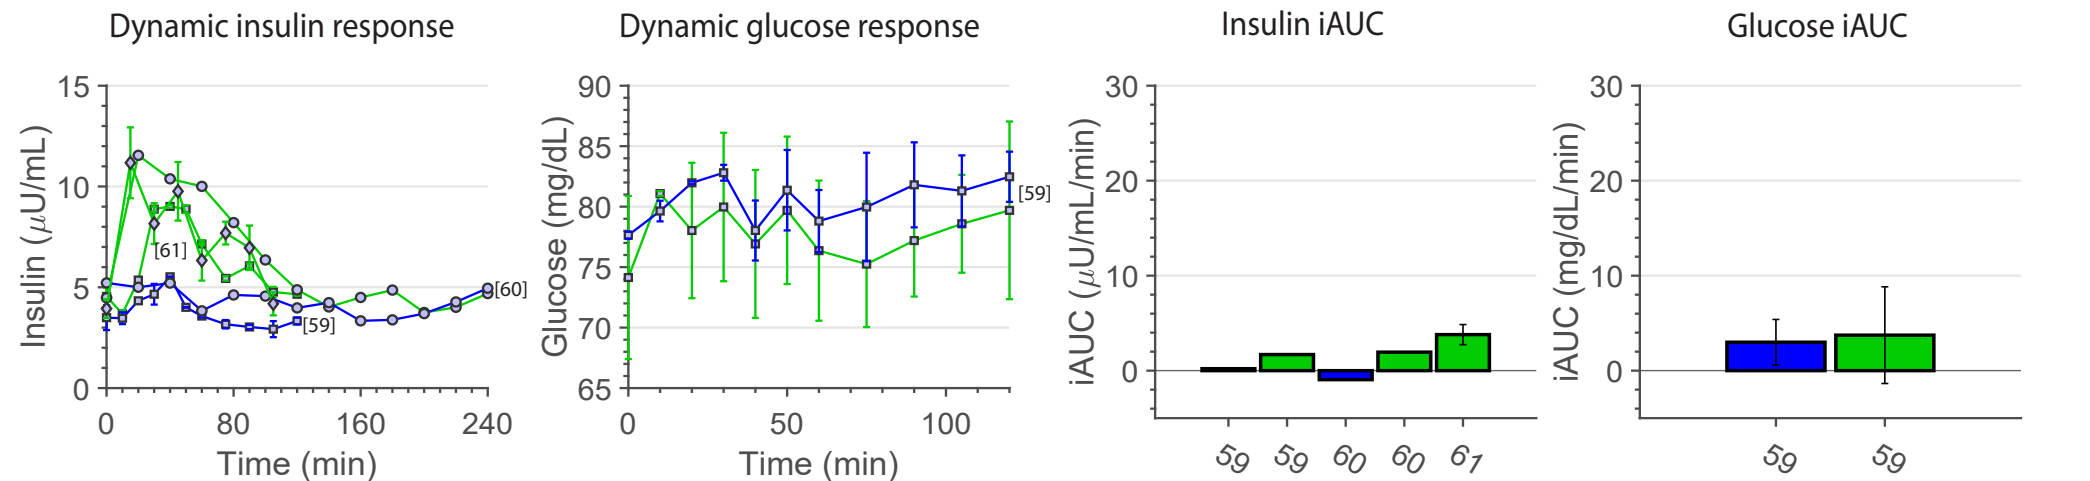

<sup>1</sup>Glucose values were not reported

| B            | Oral glutamate+glucose ingestion |                     |                |            |                     |                            |                                    |                     |                            |                                    |
|--------------|----------------------------------|---------------------|----------------|------------|---------------------|----------------------------|------------------------------------|---------------------|----------------------------|------------------------------------|
| First author | Subject condition                | Amount administered | Ingestion type | # Subjects | Insulin time points | Insulin time to peak (min) | Insulin peak concentration (μU/mL) | Glucose time points | Glucose time to peak (min) | Glucose peak concentration (mg/dL) |
| No Data      | No Data                          | No Data             | No Data        | No Data    | No Data             | No Data                    | No Data                            | No Data             | No Data                    | No Data                            |

| C            | Intravenous glutamate infusion |                     |                |            |                     |                            |                                    |                     |                            |                                    |
|--------------|--------------------------------|---------------------|----------------|------------|---------------------|----------------------------|------------------------------------|---------------------|----------------------------|------------------------------------|
| First author | Subject condition              | Amount administered | Ingestion type | # Subjects | Insulin time points | Insulin time to peak (min) | Insulin peak concentration (μU/mL) | Glucose time points | Glucose time to peak (min) | Glucose peak concentration (mg/dL) |
| No Data      | No Data                        | No Data             | No Data        | No Data    | No Data             | No Data                    | No Data                            | No Data             | No Data                    | No Data                            |

\*iAUC: Incremental area under the curve  
\*\*iAUC, time to peak and peak concentrations were calculated from the extracted data
