# Supplementary material for: The Impact of Amino Acids on Postprandial Glucose and Insulin Kinetics in Humans: A Quantitative Overview
Source: Nutrients. 2020 Oct 21;12(10):3211. doi: 10.3390/nu12103211 (PMC7594055; doi:10.3390/nu12103211)
Supplement: Supplementary file 1 [file nutrients-12-03211-s001.zip]

Archive with 11 entries (11 files):
- Supplemental File 1.docx
- Supplemental Figure 1.pdf
- Supplemental Figure 2.pdf
- Supplemental Figure 3.pdf
- Supplemental Figure 4.pdf
- Supplemental Figure 5.pdf
- Supplemental Figure 6.pdf
- Supplemental Figure 7.pdf
- Supplemental Figure 8.pdf
- Supplemental Figure 9.pdf
- Supplemental Figure 10.pdf
